1           **Defining proximity proteomics of post-translationally modified**  
2           **proteins by antibody-mediated protein A-APEX2 labeling**

3  
4 Xinran Li<sup>1#</sup>, Jiaqi Zhou<sup>1#</sup>, Wenjuan Zhao<sup>1#</sup>, Qing Wen<sup>1#</sup>, Weijie Wang<sup>1</sup>, Huipai Peng<sup>1</sup>, Kelly J.  
5 Bouchonville<sup>3</sup>, Steven M. Offer<sup>2, 3, 4, 5</sup>, Zhiquan Wang<sup>2\*</sup>, Nan Li<sup>1\*</sup>, Haiyun Gan<sup>1\*</sup>

6  
7 <sup>1</sup> Shenzhen Key Laboratory of Synthetic Genomics, Guangdong Provincial Key Laboratory of  
8 Synthetic Genomics, CAS Key Laboratory of Quantitative Engineering Biology, Shenzhen  
9 Institute of Synthetic Biology, Shenzhen Institutes of Advanced Technology, Chinese Academy  
10 of Sciences, Shenzhen 518055, China

11 <sup>2</sup> Division of Hematology, Department of Medicine, Mayo Clinic, Rochester, MN 55905 USA

12 <sup>3</sup> Department of Molecular Pharmacology and Experimental Therapeutics, Mayo Clinic, Rochester,  
13 MN 55905 USA

14 <sup>4</sup> Mayo Clinic College of Medicine, Rochester, MN 55905 USA

15 <sup>5</sup> Mayo Clinic Cancer Center, Rochester, MN 55905 USA

16  
17 # These authors contributed equally to this work.

18 \* Corresponding author

---

\* Zhiquan Wang: E-mail address: Wang.Zhiquan@mayo.edu.

\* Nan Li: E-mail address: nan.li@siat.ac.cn.

\* Haiyun Gan: E-mail address: hy.gan@siat.ac.cn; Tel: +86-0755-26653824

## 19 **Abstract**

20 Proximity labeling catalyzed by promiscuous enzymes, such as APEX2, has emerged as a  
21 powerful approach to characterize multiprotein complexes and protein–protein interactions.  
22 However, current methods depend on the expression of exogenous fusion proteins and cannot  
23 be applied to post-translational modifications. To address this limitation, we developed a new  
24 method to label proximal proteins of interest by antibody-mediated protein A-APEX2 labeling  
25 (AMAPEX). In this method, a modified protein is bound *in situ* by a specific antibody, which then  
26 tethers a protein A-APEX2 (pA-APEX2) fusion protein. Activation of APEX2 labels the nearby  
27 proteins with biotin; these proteins are then purified using streptavidin beads and are identified by  
28 mass spectrometry. We demonstrate the utility of this approach by profiling the binding proteins  
29 of histone modifications including H3K27me3, H3K9me3, H3K4me3, H4K5ac and H4K12ac, and  
30 we verified the genome-wide colocalization of these identified proteins with bait proteins by  
31 published CHIP-seq analysis. Overall, AMAPEX is an efficient tool to identify proteins that interact  
32 with modified proteins.

## 33 **Introduction**

34 Biological functions are regulated by interacting biomolecules (protein, DNA, RNA, etc.);  
35 dysregulation of these interactions can lead to human diseases including cancers<sup>1,2</sup>. Methods  
36 that map these molecular interactions provide tools to study biological processes and therapeutics  
37 for human diseases. Recently, proximity labeling was developed and used to map molecular  
38 interactions. Proximity labeling uses engineered enzymes, such as peroxidase or biotin ligase,  
39 that are tagged to a protein of interest<sup>3</sup> to modify nearby factors that interact with that protein of  
40 interest. This method has been successfully utilized to map protein–protein<sup>3</sup>, RNA–protein<sup>4,6</sup>,  
41 protein–DNA<sup>7,8</sup>, and chromatin interactions<sup>9</sup>. However, proximity labeling has some limitations.  
42 First, the expression of exogenous fusion proteins with engineered enzymes is required, which  
43 limits its use in difficult-to-transfect cells and tissues. Additionally, mapping the biomolecules that  
44 interact with posttranslationally modified (PTM) proteins like histones is complex.

45 Histone modifications play critical roles in regulating basic biological processes to maintain cell  
46 identity and genome integrity<sup>10,11</sup>. These modifications are recognized by reader proteins and then  
47 form functional multiprotein complexes with other regulatory factors in a spatiotemporal manner<sup>12</sup>.  
48 Alterations in the interacting networks of the histone modifications can lead to human diseases<sup>13</sup>.  
49 However, current proteomics-based assays to measure the affinity of proteins to chromatin  
50 marks<sup>14-18</sup> rely on the use of synthetic histone peptides, *in-vitro*–reconstituted nucleosomes, or  
51 expression of external protein domains; thus, it is challenging to identify the proximal protein  
52 interactome of histone modifications *in situ*.

53 Here, we overcome the limitations of traditional proximity labeling methods using a protein A-  
54 APEX2 (pA-APEX2) fusion protein. The protein of interest is bound *in situ* by a specific antibody,  
55 which then tethers a pA-APEX2 fusion protein. Activation of APEX2 labels the nearby proteins  
56 with biotin; these proteins are then purified using streptavidin beads and identified using mass  
57 spectrometry.

## 58 **Results**

59 The strategy behind antibody-mediated pA-APEX2 labeling (AMAPEX) is to tether a peroxidase  
60 or biotin ligase to antibodies that are specifically bound to a protein of interest (here, histone  
61 modifications; Fig. 1a). Subsequent activation of the tethered enzyme should result in biotinylation  
62 of biomolecules near the target protein. Identification of the biotinylated proteins by mass  
63 spectrometry is expected to provide information about the nearby proteomic landscape of the  
64 protein of interest (Fig. 1b). We selected APEX2 as the enzyme of choice because it has robust  
65 enzymatic activity *in vitro* and can be stringently controlled by H<sub>2</sub>O<sub>2</sub><sup>5</sup>.

66 We confirmed the enzymatic activity of the purified pA-APEX2 by labeling the whole-cell lysate *in*  
67 *vitro*. (Supplementary Fig. 1a–d). We then modified the immunofluorescence assay to test if  
68 enzymatically active pA-APEX2 can be recruited to the protein of interest by specific antibodies.  
69 The permeabilized cells were incubated with H3K9me3/H3K27me3 antibodies followed by pA-  
70 APEX2. The unbound pA-APEX2 was extensively washed out, and biotinylation was induced by  
71 H<sub>2</sub>O<sub>2</sub> and biotin-phenol (BP). The co-localization of biotin and H3K9me3/H3K27me3 suggested  
72 that pA-APEX2 can be recruited to specific sites by specific antibodies and activated *in situ* (Fig  
73 1c). As expected, no enrichment was observed in the samples without BP or in the IgG controls.  
74 We then tested the activity of pA-APEX2 in cell suspensions. Lightly crosslinked MEF cells were  
75 permeabilized and incubated with H3K27me3 antibody followed by pA-APEX2 (see detailed  
76 description in the Methods section). Biotinylation of the proteins around H3K27me3 was induced  
77 and then analyzed by western blot (Supplementary Fig.1e). Efficient biotin labeling in the  
78 presence of H3K27me3 antibody indicated that pA-APEX2 targeting can be accurately controlled.  
79 To test whether pA-APEX2 could be used to identify proteins associated with histone  
80 modifications *in situ*, the biotinylated proteins were enriched with streptavidin beads and analyzed  
81 using quantitative LC-MS/MS (Fig.1 b and d); samples that were incubated with IgG and without  
82 H<sub>2</sub>O<sub>2</sub> were included as negative controls. Compared to ChromID<sup>14</sup> and BAC-GFP<sup>15</sup>, we  
83 reproducibly identified most of the PRC1 and PRC2 subunits using quantitative LC-MS/MS (Fig.  
84 1f, g). In addition to the known proteins, we identified a number of candidate proteins associated  
85 with H3K27me3 (Supplementary Table 1). Gene ontology (GO) term analysis indicated that these  
86 proteins were enriched in known cellular components associated with H3K27me3, including

87 transcription repressor complex<sup>19</sup>, histone methyltransferase complex<sup>19</sup>, and DNA replication  
88 fork<sup>20,21</sup> (Fig.1e and Supplementary Fig. 2). To validate our results, we assessed the genome-  
89 wide enrichment of three candidates, the H3K36 methyltransferase Nsd2 and the polybromo-  
90 associated BAF (PBAF) subunits Brd7 and Arid2<sup>22</sup>, by analyzing published ChIP-seq datasets<sup>23</sup>  
91 (Supplementary Fig. 3). We verified the colocalization of the PBAF subunits Brd7 and Arid2 with  
92 H3K27me3 in MCF-7 cells by ChIP-seq (Supplementary Fig 3a–d), which indicates that PBAF  
93 may recognize H3K27me3 to remodel suppressed chromatin<sup>24</sup>. The ChIP-seq results also  
94 showed that around half of Nsd2 peaks in K-562 cells overlap with H3K27me3 peaks  
95 (Supplementary Fig 3e, f), which supported our results that Nsd2 is proximal to H3K27me3.  
96 H3K36me2 is a negative regulator of H3K27me3<sup>25</sup> and has been boundary barrier of PRC-  
97 mediated H3K27me3 spreading<sup>26</sup>. Thus, our results suggest that the binding of NSD2 to  
98 H3K27me3 may provide new insights into the mechanism that regulates epigenetic spreading.  
99 We next generalized our method to map the interactomes of major histone modifications including  
100 H3K4me3, H3K9me3, H4K5ac, and H4K12ac. Western blot demonstrated successful labelling  
101 and enrichment of the proximal proteins of these histone marks (Fig. 2a and Supplementary Fig.  
102 4). We next performed LC-MS/MS to identify and map the proteomes of these modifications. We  
103 first analyzed the proteins enriched by H3K9me3 labeling and identified several known H3K9me3  
104 binding proteins including the reader proteins Lrwd1<sup>27,28</sup>, Cbx5 (HP1 $\alpha$ ) and Cbx3 (HP1 $\gamma$ )<sup>29</sup>; the  
105 H3K9 methyltransferases Ehmt1 and Setdb1; the DNA replication–dependent nucleosome  
106 assembly chaperones Chaf1a and Chaf1b; and the DNA methylation maintenance proteins  
107 Mecp2, Uhrf1, and DNMT1 (Supplementary Fig. 5a, b and Supplementary Table 1). We also  
108 identified H3K9me3-binding proteins that were enriched in functional complexes like the DNA  
109 replication fork, methyltransferase complex, and PcG protein complex<sup>30</sup> (Supplementary Fig 5c,  
110 d). Therefore, this method could help us understand the mechanism of epigenetic inheritance  
111 including histone and DNA methylation.

112 In addition to the above, we also identified the MLL H3K4 methyltransferase Kmt2a and  
113 COMPASS-related proteins including Wdr5 and Cxxc1<sup>31</sup> in the H3K4me3 interactome  
114 (Supplementary Fig. 6a, b and Supplementary Table 1). H3K4me3-proximal proteins are mostly  
115 enriched in pathways related to active transcription including RNA splicing and euchromatin  
116 (Supplementary Fig. 6c, d).

117 We next focused on proteins that interacted with H4K5ac, the histone modification that marks  
118 newly synthesized histones<sup>32</sup>. The H4K5ac interactome is enriched with MCM complex<sup>33</sup> and DNA  
119 replication fork proteins (Fig. 2b, c), which confirms that newly synthesized H3/H4 complexes are  
120 deposited in a DNA replication–dependent manner. However, we did not observe an association

121 between H4K12ac-labeled proteins and DNA replication (Supplementary Fig. 7a–c), which  
122 suggested that the H4K12ac modification may not be recognized by new histone H3/H4  
123 deposition machinery. Both H4K5ac and H4K12ac are enriched in RNA spliceosomes (Fig. 2b, c  
124 and Supplementary Fig. 7a, b), indicating that they may be involved in RNA splicing.

125 In summary, we provide a new approach to identify proximal complexes of a protein of interest  
126 without the expression of exogenous fusion proteins. We applied our method to identify proteins  
127 associated with major histone modifications (Supplementary Fig. 8 and Supplementary Table 2).

128 Both known and previously unreported interactors of these histone modifications were identified  
129 by our method. APEX2 can also biotinylate RNA and DNA<sup>34</sup>, which provides the opportunity to  
130 apply AMAPEX to map the DNA and RNA molecules that bind to a protein of interest in future  
131 studies.

132 **Reference**

- 133 1 Alberts, B. The cell as a collection of protein machines: preparing the next  
134 generation of molecular biologists. *Cell* **92**, 291-294, doi:10.1016/s0092-  
135 8674(00)80922-8 (1998).
- 136 2 Hartwell, L. H., Hopfield, J. J., Leibler, S. & Murray, A. W. From molecular to  
137 modular cell biology. *Nature* **402**, C47-52, doi:10.1038/35011540 (1999).
- 138 3 Qin, W., Cho, K. F., Cavanagh, P. E. & Ting, A. Y. Deciphering molecular  
139 interactions by proximity labeling. *Nat Methods* **18**, 133-143, doi:10.1038/s41592-  
140 020-01010-5 (2021).
- 141 4 Han, S. *et al.* RNA-protein interaction mapping via MS2- or Cas13-based APEX  
142 targeting. *Proc Natl Acad Sci U S A* **117**, 22068-22079,  
143 doi:10.1073/pnas.2006617117 (2020).
- 144 5 Fazal, F. M. *et al.* Atlas of Subcellular RNA Localization Revealed by APEX-Seq.  
145 *Cell* **178**, 473-490 e426, doi:10.1016/j.cell.2019.05.027 (2019).
- 146 6 Yi, W. *et al.* CRISPR-assisted detection of RNA-protein interactions in living cells.  
147 *Nat Methods* **17**, 685-688, doi:10.1038/s41592-020-0866-0 (2020).
- 148 7 Myers, S. A. *et al.* Discovery of proteins associated with a predefined genomic  
149 locus via dCas9-APEX-mediated proximity labeling. *Nat Methods* **15**, 437-439,  
150 doi:10.1038/s41592-018-0007-1 (2018).
- 151 8 Gao, X. D. *et al.* C-BERST: defining subnuclear proteomic landscapes at genomic  
152 elements with dCas9-APEX2. *Nat Methods* **15**, 433-436, doi:10.1038/s41592-018-  
153 0006-2 (2018).
- 154 9 Qiu, W. *et al.* Determination of local chromatin interactions using a combined  
155 CRISPR and peroxidase APEX2 system. *Nucleic Acids Res* **47**, e52,  
156 doi:10.1093/nar/gkz134 (2019).
- 157 10 Jenuwein, T. & Allis, C. D. Translating the histone code. *Science* **293**, 1074-1080,  
158 doi:10.1126/science.1063127 (2001).
- 159 11 Allis, C. D. & Jenuwein, T. The molecular hallmarks of epigenetic control. *Nat Rev*  
160 *Genet* **17**, 487-500, doi:10.1038/nrg.2016.59 (2016).
- 161 12 Ruthenburg, A. J., Li, H., Patel, D. J. & Allis, C. D. Multivalent engagement of  
162 chromatin modifications by linked binding modules. *Nat Rev Mol Cell Biol* **8**, 983-  
163 994, doi:10.1038/nrm2298 (2007).
- 164 13 Easwaran, H., Tsai, H. C. & Baylin, S. B. Cancer epigenetics: tumor heterogeneity,  
165 plasticity of stem-like states, and drug resistance. *Mol Cell* **54**, 716-727,  
166 doi:10.1016/j.molcel.2014.05.015 (2014).
- 167 14 Villasenor, R. *et al.* ChromID identifies the protein interactome at chromatin marks.  
168 *Nat Biotechnol* **38**, 728-736, doi:10.1038/s41587-020-0434-2 (2020).
- 169 15 Vermeulen, M. *et al.* Quantitative interaction proteomics and genome-wide  
170 profiling of epigenetic histone marks and their readers. *Cell* **142**, 967-980,  
171 doi:10.1016/j.cell.2010.08.020 (2010).
- 172 16 Bartke, T. *et al.* Nucleosome-interacting proteins regulated by DNA and histone  
173 methylation. *Cell* **143**, 470-484, doi:10.1016/j.cell.2010.10.012 (2010).
- 174 17 Nikolov, M. *et al.* Chromatin affinity purification and quantitative mass spectrometry  
175 defining the interactome of histone modification patterns. *Mol Cell Proteomics* **10**,  
176 M110 005371, doi:10.1074/mcp.M110.005371 (2011).

- 177 18 Eberl, H. C., Spruijt, C. G., Kelstrup, C. D., Vermeulen, M. & Mann, M. A map of  
178 general and specialized chromatin readers in mouse tissues generated by label-  
179 free interaction proteomics. *Mol Cell* **49**, 368-378,  
180 doi:10.1016/j.molcel.2012.10.026 (2013).
- 181 19 van Mierlo, G., Veenstra, G. J. C., Vermeulen, M. & Marks, H. The Complexity of  
182 PRC2 Subcomplexes. *Trends Cell Biol* **29**, 660-671, doi:10.1016/j.tcb.2019.05.004  
183 (2019).
- 184 20 Alabert, C. *et al.* Nascent chromatin capture proteomics determines chromatin  
185 dynamics during DNA replication and identifies unknown fork components. *Nat*  
186 *Cell Biol* **16**, 281-293, doi:10.1038/ncb2918 (2014).
- 187 21 Reveron-Gomez, N. *et al.* Accurate Recycling of Parental Histones Reproduces  
188 the Histone Modification Landscape during DNA Replication. *Mol Cell* **72**, 239-249  
189 e235, doi:10.1016/j.molcel.2018.08.010 (2018).
- 190 22 Hodges, C., Kirkland, J. G. & Crabtree, G. R. The Many Roles of BAF (mSWI/SNF)  
191 and PBAF Complexes in Cancer. *Cold Spring Harb Perspect Med* **6**,  
192 doi:10.1101/cshperspect.a026930 (2016).
- 193 23 Oki, S., Ohta, T., Shioi, G., Hatanaka, H. & Ogasawara, O. J. E. r. ChIP-Atlas: a  
194 data-mining suite powered by full integration of public ChIP-seq data. (2018).
- 195 24 Kadoch, C. & Crabtree, G. R. Mammalian SWI/SNF chromatin remodeling  
196 complexes and cancer: Mechanistic insights gained from human genomics. *Sci*  
197 *Adv* **1**, e1500447, doi:10.1126/sciadv.1500447 (2015).
- 198 25 Streubel, G. *et al.* The H3K36me2 Methyltransferase Nsd1 Demarcates PRC2-  
199 Mediated H3K27me2 and H3K27me3 Domains in Embryonic Stem Cells. *Mol Cell*  
200 **70**, 371-379 e375, doi:10.1016/j.molcel.2018.02.027 (2018).
- 201 26 De, S. *et al.* Defining the Boundaries of Polycomb Domains in *Drosophila*. *Genetics*  
202 **216**, 689-700, doi:10.1534/genetics.120.303642 (2020).
- 203 27 Chan, K. M. & Zhang, Z. Leucine-rich repeat and WD repeat-containing protein 1  
204 is recruited to pericentric heterochromatin by trimethylated lysine 9 of histone H3  
205 and maintains heterochromatin silencing. *J Biol Chem* **287**, 15024-15033,  
206 doi:10.1074/jbc.M111.337980 (2012).
- 207 28 Shen, Z. *et al.* A WD-repeat protein stabilizes ORC binding to chromatin. *Mol Cell*  
208 **40**, 99-111, doi:10.1016/j.molcel.2010.09.021 (2010).
- 209 29 Zeng, W., Ball, A. R., Jr. & Yokomori, K. HP1: heterochromatin binding proteins  
210 working the genome. *Epigenetics* **5**, 287-292, doi:10.4161/epi.5.4.11683 (2010).
- 211 30 Grossniklaus, U. & Paro, R. Transcriptional silencing by polycomb-group proteins.  
212 *Cold Spring Harb Perspect Biol* **6**, a019331, doi:10.1101/cshperspect.a019331  
213 (2014).
- 214 31 Cenik, B. K. & Shilatifard, A. COMPASS and SWI/SNF complexes in development  
215 and disease. *Nat Rev Genet* **22**, 38-58, doi:10.1038/s41576-020-0278-0 (2021).
- 216 32 Alabert, C. & Groth, A. Chromatin replication and epigenome maintenance. *Nat*  
217 *Rev Mol Cell Biol* **13**, 153-167, doi:10.1038/nrm3288 (2012).
- 218 33 Tye, B. K. MCM proteins in DNA replication. *Annu Rev Biochem* **68**, 649-686,  
219 doi:10.1146/annurev.biochem.68.1.649 (1999).
- 220 34 Zhou, Y. *et al.* Expanding APEX2 Substrates for Proximity-Dependent Labeling of  
221 Nucleic Acids and Proteins in Living Cells. *Angew Chem Int Ed Engl* **58**, 11763-  
222 11767, doi:10.1002/anie.201905949 (2019).

- 223 35 Hatice, S. *et al.* CUT&Tag for efficient epigenomic profiling of small samples and  
224 single cells. (2019).
- 225 36 Kaya-Okur, H. S. *et al.* CUT&Tag for efficient epigenomic profiling of small samples  
226 and single cells. *Nat Commun* **10**, 1930, doi:10.1038/s41467-019-09982-5 (2019).
- 227 37 Fazal, F. M., Han, S., Kaewsapsak, P., Parker, K. R. & Ting, A. Y. J. C. Atlas of  
228 Subcellular RNA Localization Revealed by APEX-seq. **178** (2019).
- 229 38 Li, N. *et al.* Relative quantification of proteasome activity by activity-based protein  
230 profiling and LC-MS/MS. **8**, 1155-1168 (2013).



231 **Figures**

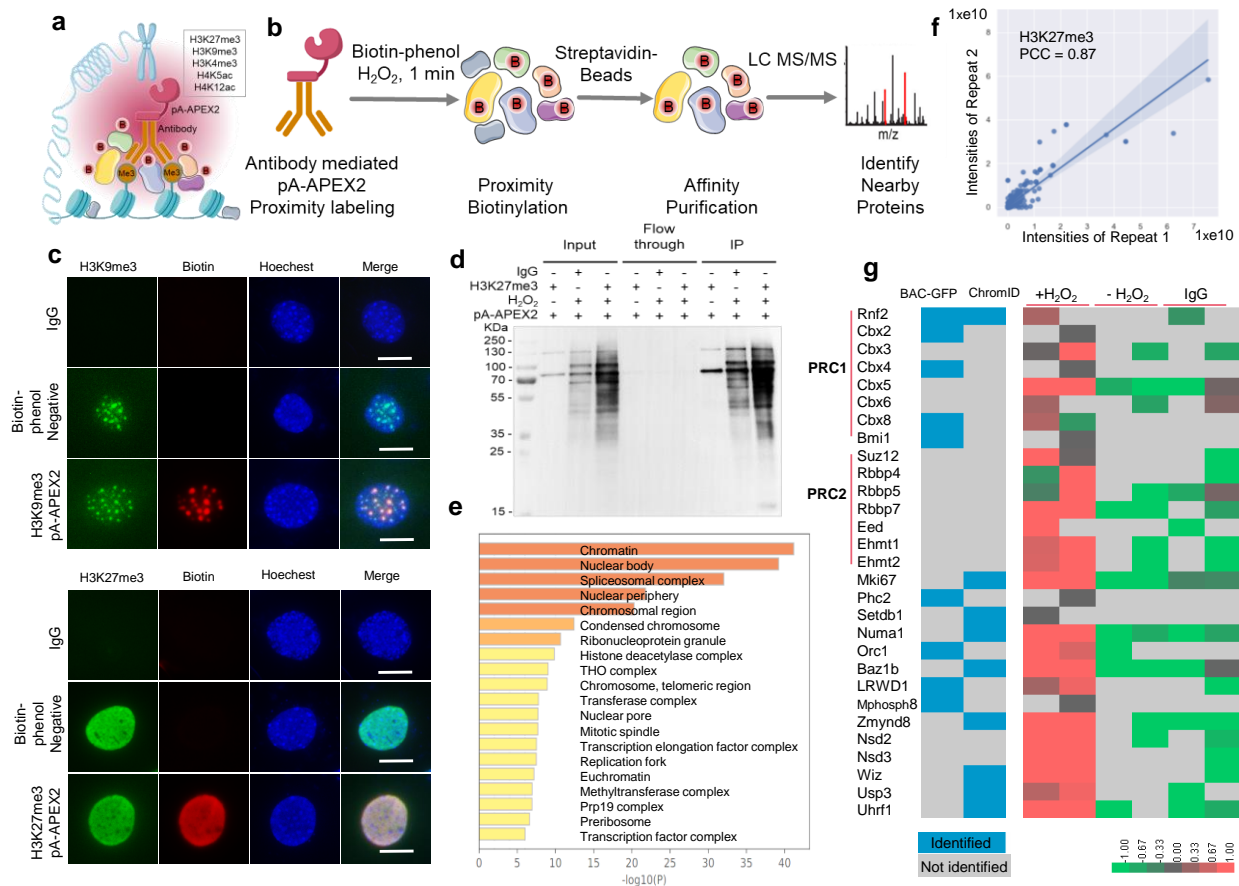

232

233

234 **Figure 1. Antibody-mediated proximity biotinylation by pA-APEX2.** **a**, Illustration of antibody-  
 235 mediated pA-APEX2 proximity labelling. pA-APEX2 is recruited to the targeting sites by specific  
 236 histone modification antibodies. Biotin-phenol and H<sub>2</sub>O<sub>2</sub> are added to 0.1% formaldehyde-fixed  
 237 cells for 1 minute to induce biotinylation (B, biotin) of proteins within 20 nm of APEX2. **b**,  
 238 Biotinylated proteins are purified using streptavidin beads and analyzed by LC MS/MS. **c**,  
 239 Fluorescence imaging of histone modifications and antibody-mediated biotinylation. H3K9me3  
 240 and H3K27me3 were visualized by immunofluorescence staining. Biotinylation was induced by  
 241 adding biotin-phenol and H<sub>2</sub>O<sub>2</sub> and visualized by staining with streptavidin-Cy3 (red). Nuclei were  
 242 counterstained with Hoechst33342. Scale bars, 10 μm. **d**, pA-APEX2-mediated protein labeling  
 243 in whole-cell lysates. Whole-cell extracts from MEF cells were incubated with pA-APEX2 and  
 244 H3K27me3 antibody, and biotinylation was induced by adding biotin-phenol and H<sub>2</sub>O<sub>2</sub> and  
 245 analyzed by western blot as indicated. **e**, The top 20 enriched cellular components GO terms of  
 246 H3K27me3- proximal proteins. Bar plots represent the  $-\log_{10}(p$  value) of enriched terms. **f**, The  
 247 reproducibility of two biological replicates of pA-APEX2 experiments in the identification of

248 H3K27me3-interacting proteins was calculated using the Pearson correlation coefficient (PCC).  
249 **g**, H3K27me3-interacting proteins identified by pA-APEX2. Heatmap showing the enrichment as  
250 log<sub>2</sub>-fold intensity change of interacting proteins relative to the controls as indicated. Data are  
251 shown as Z scores. Blocks in blue represent the enrichment of proteins identified by ChromID  
252 and BAC-GFP in previous publications.

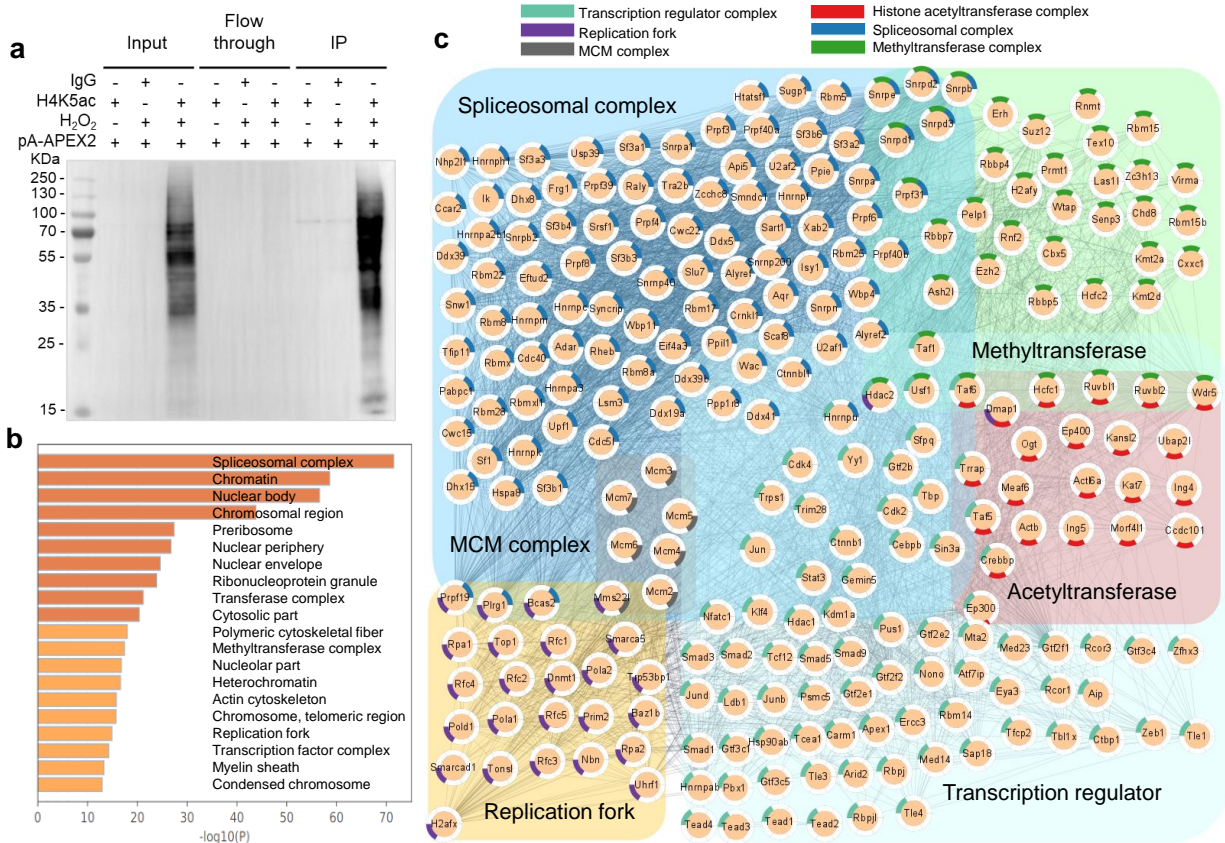

253

254

255

256

257

258

259

260

261

262

263

**Figure 2. The proximal proteome of H4K5ac identified by AMAPEX.** **a**, H4K5ac-proximal proteins were biotinylated by AMAPEX and purified using streptavidin beads. Whole-cell lysates, flow through, and streptavidin-purified proteins were analyzed by western blot as indicated. **b**, The top 20 enriched cellular component GO terms for the H4K5ac-proximal proteins. Bar plots represent the  $-\log_{10}(p$  value) of the enriched terms. **c**, Network analysis of H4K5ac interactomes according to the major cellular component GO terms (N proteins = 254, of all 1783). Individual proteins are shown as nodes and interactions are shown as edges. The interactions were retrieved from the STRING database with interaction score  $> 0.4$ . Proteins were selected based on a minimum of  $\log_2\text{-FC} = 1$  in two pA-APEX2 experiments.

## 264 **Materials**

| <b>Antibodies</b>                                       | <b>SOURCE</b>                | <b>IDENTIFIER</b>               |
|---------------------------------------------------------|------------------------------|---------------------------------|
| H3K4me3                                                 | Active Motif                 | Cat# 39159; RRID: AB_2615077    |
| H3K9me3                                                 | Abcam                        | Cat# ab8898; RRID: AB_306848    |
| H3K27me3                                                | Cell Signaling<br>Technology | Cat# 9733S; RRID: AB_2616029    |
| H4K5ac                                                  | Abcam                        | Cat# ab51997; RRID: AB_2264109  |
| H4K12ac                                                 | Abcam                        | Cat# ab177793; RRID: AB_2651187 |
| IgG                                                     | Abcam                        | Cat# ab6701; RRID:AB_956011     |
| Donkey anti-Rabbit IgG<br>(H+L) Alexa Fluor Plus<br>488 | Invitrogen                   | Cat# A32790; RRID: AB_2762833   |
| Streptavidin-Cy3                                        | Sigma                        | Cat# S6402-1ML                  |

## 265 **Methods**

### 266 **Plasmids**

267 The 3XFlag-pA-Tn5-FI plasmid (Addgene plasmid # 124601) was used as the backbone to  
268 construct 3XFlag-pA-APEX2. Tn5 cDNA was cleaved with *NdeI* and *SpeI* and replaced with  
269 APEX2, which was amplified by polymerase chain reaction (PCR) from GFP-APEX2-NIK3x (GFP-  
270 APEX2-NIK3x was a gift from Alice Ting (Addgene plasmid # 129274;  
271 <http://n2t.net/addgene:129274>; RRID: Addgene\_129274).

### 272 **3XFlag-pA-APEX2 protein purification**

273 Protein purification was performed as described by Steven Henikoff *et al.*<sup>35</sup>. The 3XFlag-pA-  
274 APEX2 plasmid was transformed into C3013 cells and incubated overnight at 37°C. A single  
275 colony was selected and inoculated into 3 mL LB medium, and growth was continued at 37°C for  
276 4 h. This culture was used to start a 400-mL culture in 100 µg/mL carbenicillin-containing LB  
277 medium and incubated on a shaker until it reached O.D. ~0.6; the culture was then chilled on ice  
278 for 30 min. Fresh IPTG (Sigma, I6758) was added to 0.25 mM to induce expression, and the  
279 culture was incubated at 18°C on a shaker overnight. The culture was collected by centrifugation  
280 at 6,000 × *g* and 4°C for 30 min. The pellet was stored at -80°C until processing. The protein  
281 purification steps were described as follows. Briefly, a frozen pellet was resuspended in 40 mL  
282 chilled HEGX Buffer (20 mM HEPES-KOH at pH 7.2, 1 M NaCl, 1 mM EDTA, 10% glycerol, 0.2%  
283 Triton X-100) including 1× Roche Complete EDTA-free protease inhibitor tablets (Invitrogen,  
284 M9260G) and kept on ice for 15 min. The lysate was sonicated 15 min (300 W, 3 s on, 5 s off) on

285 ice. The sonicated lysate was centrifuged at  $16,000 \times g$  at  $4^{\circ}\text{C}$  for 30 min, and the soluble fraction  
286 was moved to fresh 50-mL tubes. A 4-mL aliquot of chitin resin (NEB, S6651S) was packed into  
287 each of two disposable columns (Bio-rad, 7321010). Columns were washed with 20 mL HEGX  
288 Buffer. The supernatant was added to the chitin resin slowly and then incubated on a rotator at  
289  $4^{\circ}\text{C}$  for 1 h. The unbound soluble fraction was drained, and the columns were washed with 20 mL  
290 HEGX buffer and with 20 mL HEGX buffer containing Roche Complete EDTA-free protease  
291 inhibitor tablets. The chitin slurry was transferred to a 15-mL tube and resuspended in elution  
292 buffer (6 mL HEGX buffer with 100 mM DTT (Roche, D0632)). The tube was placed on a nutator  
293 at  $4^{\circ}\text{C}$  for 60 h. The eluate was collected and dialyzed twice in 1 L Dialysis Buffer (100 mM  
294 HEPES-KOH pH 7.2, 0.2 M NaCl, 0.2 mM EDTA, 2 mM DTT, 0.2% Triton X-100, 20% Glycerol).  
295 The dialyzed protein solution was concentrated using Amicon Ultra-4 Centrifugal Filter Units 30 K  
296 (Millipore UFC803024), and sterile glycerol was added to make a final 50% glycerol stock of the  
297 purified protein. The purified protein was aliquoted and stored at  $-20^{\circ}\text{C}$ . The pA-APEX2  
298 purification was analyzed by SDS-PAGE. The concentration of pA-APEX2 was determined using  
299 BSA standards.

### 300 **Mammalian cell culture**

301 Mouse embryonic fibroblast (MEF) cell lines were cultured in DMEM/high glucose (HyClone,  
302 SH30243.01) supplemented with 10% fetal bovine serum (ExCell Bio, FSP500), 100 units/mL  
303 penicillin, and 100 mg/mL streptomycin at  $37^{\circ}\text{C}$  under 5%  $\text{CO}_2$ . Mycoplasma testing was  
304 performed before experiments.

### 305 **Immunofluorescence staining and fluorescence microscopy**

306 MEF cell lines were fixed with 4% paraformaldehyde in PBS at room temperature for 15 min. Cells  
307 were then washed with PBS three times and blocked for 1 h with 3% BSA in 0.1% PBST (blocking  
308 buffer) at room temperature. Cells were incubated with primary antibodies (Rabbit anti-H3K9me3  
309 antibody, Abcam, ab8898, RRID: AB\_306848, 1:100 dilution; Rabbit anti-H3K27me3 antibody, Cell  
310 Signaling Technology, 9733S, RRID: AB\_2616029, 1:100 dilution) in blocking buffer for 1 h at room  
311 temperature. After washing three times with PBS, cells were incubated with pA-APEX2 (in this  
312 study,  $4 \mu\text{g}/\mu\text{L}$ , 1:400) in blocking buffer for 1 h and then washed three times with PBST. Next,  
313 cells were incubated with 500  $\mu\text{M}$  biotin phenol (BP) in PBS at room temperature for 30 min.  $\text{H}_2\text{O}_2$   
314 then was added to each well to a final concentration of 1 mM, and the plate was gently agitated  
315 for 1 min. The reaction was quenched with an equal volume of 2  $\times$  quench buffer (10 mM Trolox,  
316 20 mM sodium ascorbate, and 20mM sodium azide in PBS). Samples incubated with IgG and  
317 without BP (no-BP) were included as negative controls. After washing three times with PBS, cells

318 were incubated with secondary antibodies (Alexa Fluor 488 (Invitrogen, A32790, 1:200 dilution)  
319 and streptavidin–Cy3 (Sigma, S6402-1ML, 1:300 dilution)) in blocking buffer for 1 h at room  
320 temperature. Cells were washed and incubated Hoechst for 10 min at room temperature, washed  
321 three times with PBS, and imaged.

### 322 **pA-APEX labeling *in vitro***

323 Total protein of MEF cell lines was extracted with RIPA lysis buffer (50 mM Tris-HCl pH 7.5, 150  
324 mM NaCl, 1.5 mM MgCl<sub>2</sub>, 1 mM EGTA, 0.1% SDS, 1% NP-40, 0.4% sodium deoxycholate, 1 mM  
325 DTT, 1mM PMSF, and 1× Roche Complete EDTA-free protease inhibitor tablets) for 15 min at  
326 4°C. Cell extracts were sonicated (100 W, 3 s on, 3 s off) for 3 min. Cell extracts were clarified by  
327 centrifugation, and the amount of protein in each supernatant was measured. 20 µg total protein  
328 was incubated with 10 µM pA-APEX2 and 0.5 mM BP in PBS for 1 min. The reaction was triggered  
329 by mixing with 1 mM H<sub>2</sub>O<sub>2</sub> and stopped with quench buffer. No-H<sub>2</sub>O<sub>2</sub>, no-BP, and no-pA-APEX2  
330 samples were included as negative controls.

### 331 **pA-APEX labeling in MEF cell lines**

332 The labeling is adapted and modified from the Cut&tag method<sup>36</sup>. 2x10<sup>7</sup> cells were washed with  
333 10 mL PBS, pooled into a 50-mL tube, and centrifuged at 250 × *g* for 5 min. The cell pellet was  
334 resuspended in 1 mL PBS, crosslinked with freshly prepared formaldehyde at a final concentration  
335 of 0.1% at room temperature for 15 min, and quenched with 1/10 volume of 1.25 M glycine. The  
336 tube was inverted several times, shaken gently for 5 min, and centrifuged at 500 × *g* for 5 min.  
337 The pellet was then washed once with 10 mL PBS and centrifuged at 500 × *g* for 5 min.  
338 Supernatant was carefully aspirated, and the cell pellet was resuspended in 1 mL wash buffer (20  
339 mM HEPES pH 7.5, 150 mM NaCl, 0.5 mM spermidine, 1× Protease Inhibitor EDTA-Free tablet  
340 (Invitrogen, M9260G)), transferred to a 1.5-mL tube, and centrifuged at 500 × *g* for 5 min. The  
341 pellet was resuspended in 300 µL antibody buffer (4 µL 0.5 M EDTA, 3.3 µL 30% BSA, and 10  
342 µL 5% digitonin in 1 mL wash buffer) with 2 µL primary antibody (H3K27me3, H3K4me3,  
343 H3K9me3, H4K5ac and H4K12ac) and incubated overnight at 4°C. Then, the pellets were washed  
344 twice with 1 mL 0.01% digitonin wash buffer (20 µL 5% digitonin in 10 mL wash buffer) and  
345 centrifuged at 500 × *g* for 5 min. The pellet was incubated with 300 µL 500 µM BP in digitonin  
346 wash buffer for 30 min before incubation with 3 µL 100 mM H<sub>2</sub>O<sub>2</sub> in wash buffer for 1 min (final  
347 concentration of 1 mM H<sub>2</sub>O<sub>2</sub>). The reaction was quenched by adding 300 µL 2× quench buffer (20  
348 mM sodium azide, 20 mM sodium ascorbate, 10 mM Trolox in wash buffer)<sup>37</sup>. Then, the pellet

349 was washed twice with quench buffer. After carefully aspirating the supernatant, the cell pellet  
350 was flash frozen and stored at  $-80^{\circ}\text{C}$  until use.

### 351 **Streptavidin pull-down of biotinylated proteins and western blot analysis**

352 pA-APEX2-labeled cell pellets were lysed in RIPA lysis buffer (50 mM Tris-HCl pH 7.5, 150 mM  
353 NaCl, 1.5 mM  $\text{MgCl}_2$ , 1 mM EGTA, 1% SDS, 1% NP-40, 0.4% sodium deoxycholate, 1 mM DTT,  
354 1mM PMSF, and 1x Roche Complete EDTA-free protease inhibitor tablets) for 15 min on ice. Cell  
355 extracts were sonicated (100 W, 3 s on, 3 s off) for 3 min and then boiled for 10 min at  $100^{\circ}\text{C}$ .  
356 Cell extracts were clarified by centrifugation, and the amount of protein in each supernatant was  
357 measured. 5% of the supernatant was saved as input for western blot analysis. SDS in the sample  
358 was diluted to 0.2% with 1x cold RIPA buffer (RIPA buffer without SDS). Streptavidin–Sepharose  
359 beads (GE Healthcare, 17511301) were washed twice with 1x cold RIPA buffer (0.2% SDS), and  
360 800  $\mu\text{g}$  of each sample was separately incubated with 50  $\mu\text{L}$  bead slurry with rotation for 4 h at  
361  $4^{\circ}\text{C}$ . 5% of the flow through was saved for western blot analysis. The beads were subsequently  
362 washed twice with 1 mL wash buffer (50 mM Tris-HCl pH 7.5, 1% SDS), twice with 1 mL RIPA  
363 wash buffer (50 mM Tris-HCl pH 7.5, 150 mM NaCl, 1.5 mM  $\text{MgCl}_2$ , 1 mM EGTA, 0.2% SDS, 1%  
364 NP-40, 1 mM DTT), twice with 1 mL 8 M urea buffer, twice with 1 mL 30% acetonitrile, and twice  
365 with 1 mL 20 mM ammonium bicarbonate. 5% of the beads were saved for western blot analysis,  
366 and the remaining beads were used for LC-MS/MS analysis. For western blot analysis,  
367 biotinylated proteins were eluted by boiling the beads in 10  $\mu\text{L}$  5 x protein loading buffer and  
368 separated by 10% SDS-PAGE. The proteins were transferred to 0.22  $\mu\text{m}$  PVDF membrane  
369 (Millipore) and stained with Ponceau S. The blots were then blocked in 1% BSA in TBST at room  
370 temperature for 1 h and stained with streptavidin-HRP (Beyotime, A0303, 1:5000 dilution) in TBST  
371 for 1 h at room temperature. Blots were then washed with TBST buffer three times for 5 min,  
372 developed with Clarity Western ECL substrate (ThermoFisher), and imaged using a ChemiDoc  
373 MP Imaging System (Bio-Rad).

### 374 **On-bead digestion and liquid chromatography mass spectrometry**

375 Mass spectrometry-based proteomic experiments were performed as previously described with  
376 minor modifications<sup>38</sup>. Briefly, after enrichment and washing, beads were resuspended in 200  $\mu\text{L}$   
377 on-bead digestion buffer (50 mM HEPES pH8.0, 1  $\mu\text{M}$   $\text{CaCl}_2$ , 2% ACN); 10 mM TECP and 40  
378 mM CAA were added and incubated for 30 min at room temperature. The beads were washed  
379 with 1 mL on-bead digestion buffer. The beads were resuspended in 100  $\mu\text{L}$  on-bead digestion  
380 buffer with 1  $\mu\text{L}$  0.5  $\mu\text{g}$  LysC (Wako, 125-05061) and incubated at  $37^{\circ}\text{C}$  for 3 h. Then, on-bead  
381 digestion buffer with 0.5  $\mu\text{g}$  trypsin (Promega, V5280) was added for digestion at  $37^{\circ}\text{C}$  for 16 h.

382 The samples were desalted using stage tips before LC-MS/MS analysis. The stage tips were  
383 made of C18 material inserted in 200  $\mu$ L pipette tips. To desalt the peptide samples, C18 material  
384 was washed once with 200  $\mu$ L acetonitrile, once with 200  $\mu$ L stage tip buffer B (0.1% (vol/vol)  
385 formic acid in 50% (vol/vol) acetonitrile/H<sub>2</sub>O), and twice with 100  $\mu$ L stage tip buffer A (0.1%  
386 (vol/vol) formic acid in H<sub>2</sub>O). Peptide samples were loaded on stage tips and washed twice with  
387 100  $\mu$ L stage tip buffer A. Finally, peptide samples were eluted with 100  $\mu$ L stage tip buffer C (0.1%  
388 (vol/vol) formic acid in 40% (vol/vol) acetonitrile/H<sub>2</sub>O) and 100  $\mu$ L stage tip buffer B. The solutions  
389 were passed through the stage tips by centrifugation at 500  $\times$  g for 5 min at room temperature.  
390 The elution fractions were collected, and the solution was evaporated from peptide samples in a  
391 SpeedVac. Finally, 10  $\mu$ L stage tip buffer A was added to the samples to perform LC-MS/MS  
392 analysis.

### 393 **LC-MS/MS analysis**

394 All peptides were reconstituted in 0.1% FA (vol/vol) and separated on reversed-phase columns  
395 (trapping column: particle size = 3  $\mu$ m, C18, length = 20 mm (Thermo Fisher Scientific, P/N  
396 164535), analytical column: particle size = 2  $\mu$ m, C18, length = 150 mm (Thermo Fisher Scientific,  
397 P/N 164534)) on an Ultimate™ 3000 RSLCnano system (Thermo Fisher Scientific, San Jose, CA,  
398 USA) coupled to Orbitrap Q-Exactive™ HF (Thermo Fisher Scientific). Peptide separation was  
399 achieved using a 60-min gradient (buffer A: 0.1% FA in water, buffer B: 0.1% FA in 80% ACN) at  
400 a flow rate of 300 mL/min and analyzed by Orbitrap Q-Exactive™ HF in a data-dependent mode.  
401 The Orbitrap Q-Exactive™ HF mass spectrometer was operated in positive ion mode with ion  
402 transfer tube temperature 275°C. The positive ion spray voltage was 2.1 kV. Full-scan MS spectra  
403 (m/z 350–2000) was acquired in the Orbitrap with a resolution of 60,000. HCD fragmentation was  
404 performed at normalized collision energy of 28%. The MS2 automatic gain control (AGC) target  
405 was set to 5e4 with a maximum injection time (MIT) of 50 ms, and dynamic exclusion was set to  
406 30 s.

### 407 **MS data analysis**

#### 408 **Protein identification and label-free protein quantification**

409 Raw data were processed with MaxQuant (version 1.6.10.43) and its built-in Andromeda search  
410 engine for feature extraction, peptide identification, and protein inference. Mouse reference  
411 proteome from UniProt Database (UniProtKB/Swiss-Prot and UniProtKB/TrEMBL, version  
412 2020\_12) combined with manually annotated contaminant were applied to search the peptides  
413 and proteins. The false discovery rate (FDR) values were set to 0.01, and a match-between-runs



414 algorithm was enabled. After searching, the reverse hits, contaminants, and proteins only  
415 identified by one site were removed. Filtered results were exported and further visualized using  
416 the statistical computer language Python (version 3.8.3), online gene annotation and analysis tool  
417 Metascape (version 2021\_02), and the complex network visualizing platform Cytoscape (version  
418 3.8.2).

#### 419 **Interacting proteins detection of each specific histone mark**

420 First, raw data were analyzed in MaxQuant using the basic principles as described above. Search  
421 results were filtered at 0.01 FDR on precursor and protein group level. The Pearson correlation  
422 coefficients (PCC) of all replicates were calculated using the function `Series.corr()` in Python  
423 library pandas (version 1.0.5). Two replicate samples with the highest PCC were retained for  
424 further analysis.

425 For each histone mark, the transformed protein intensities fold change ( $\log_2$ -FC) in the pA-APEX2  
426 experiment compared to the no-H<sub>2</sub>O<sub>2</sub> control experiment and in the pA-APEX2 experiment  
427 compared to the IgG control experiment were calculated. For proteins that were not identified in  
428 pA-APEX2 experiments but were identified in no-H<sub>2</sub>O<sub>2</sub> or IgG controls, the  $\log_2$ -FCs were defined  
429 as -100. For proteins identified in pA-APEX2 experiments but not in no-H<sub>2</sub>O<sub>2</sub> or IgG controls, the  
430  $\log_2$ -FCs were defined as 100. Proteins with  $\log_2$ -FC > 1 were ultimately detached from  
431 background proteins in two independent measurements, which are considered to be potential  
432 interacting proteins of corresponding histone marks.

#### 433 **Functional gene set enrichment and interaction network visualization**

434 All proteins identified previously were mapped to mouse Metascape identifiers via the gene  
435 names. Functional gene set enrichment for each histone mark was performed using the “Custom  
436 Analysis” function in Metascape (version 2021\_02). Min overlaps of 3, 0.01 p-value cutoff, and  
437 min enrichment value of 1.5 were used. From all enriched proteins in any of the interactions, the  
438 top 20 Gene Ontology Cellular Component terms (Gene Ontology Consortium, 2020) that were  
439 significantly enriched in at least three of the interactors were selected.

440 STRING (version 11.0) interaction confidences with a confidence score of 0.4 and FDR stringency  
441 of 0.05 were added as links between identified proteins. Proteins in vital GO terms with a positive  
442  $\log_2$ -FC in histone mark interactors compared to no-H<sub>2</sub>O<sub>2</sub> and IgG were considered to be a  
443 visualization foreground. The network of each specific histone mark interactome was imported  
444 into Cytoscape (version 3.8.2) and visualized. Cytoscape (version 3.8.2) was used to layout the  
445 potential interacting proteins of each histone mark in pA-APEX2 experiments that were members  
446 of vital enriched GO terms. Visualization was based on GO term membership.

447 **Acknowledgements**

448 This work was supported by a grant from the National Key R&D program of China (grant no.  
449 2019YFA0903803), the Major Program of National Natural Science Foundation of China (grant  
450 no. 32090031), the General Program of National Natural Science Foundation of China (grant no.  
451 32070610), the Guangdong Province Fund for Distinguished Young Scholars (grant No.  
452 21050001099), the National Natural Science Foundation of China for Young Scholars (grant no.  
453 32000580), Guangdong Provincial Key Laboratory of Synthetic Genomics (grant No.  
454 2019B030301006), Shenzhen Key Laboratory of Synthetic Genomics (grant No.  
455 ZDSYS201802061806209), the Mayo Clinic Cancer Center Eagles Cancer Fund (Z.W.), Mayo  
456 Clinic Cancer Center Hematologic Malignancies Program (Z.W.), Mayo Clinic division of  
457 Hematology (Z.W.) and a grant from the Mayo Clinic Center for Biomedical Discovery (S.M.O).

458 **Author contributions**

459 H.G. and Z.W. conceived the study. X.L. and Q.W., designed experiments. N.L. provided  
460 mass spectrometry technology platform. W.Z. and W.W. designed and conducted mass  
461 spectrometry procedures. J.Z. and H.P. processed mass spectrometry data and  
462 conducted statistical analyses. All authors interpreted the data. Z.W., X.L. and Q.W. wrote  
463 the manuscript, and K.B., S.O. contributed to revision and editing of the manuscript.

464 **Competing interests**

465 The authors declare no competing interests.
